# Supplementary material
Source: PubMed Central journal article supplement (PMC4212338)

Supplementary Figure 1: Proposed reaction between AMC and the free carboxyl groups of a protein (R-), mediated by sodium cyanoborohydride.

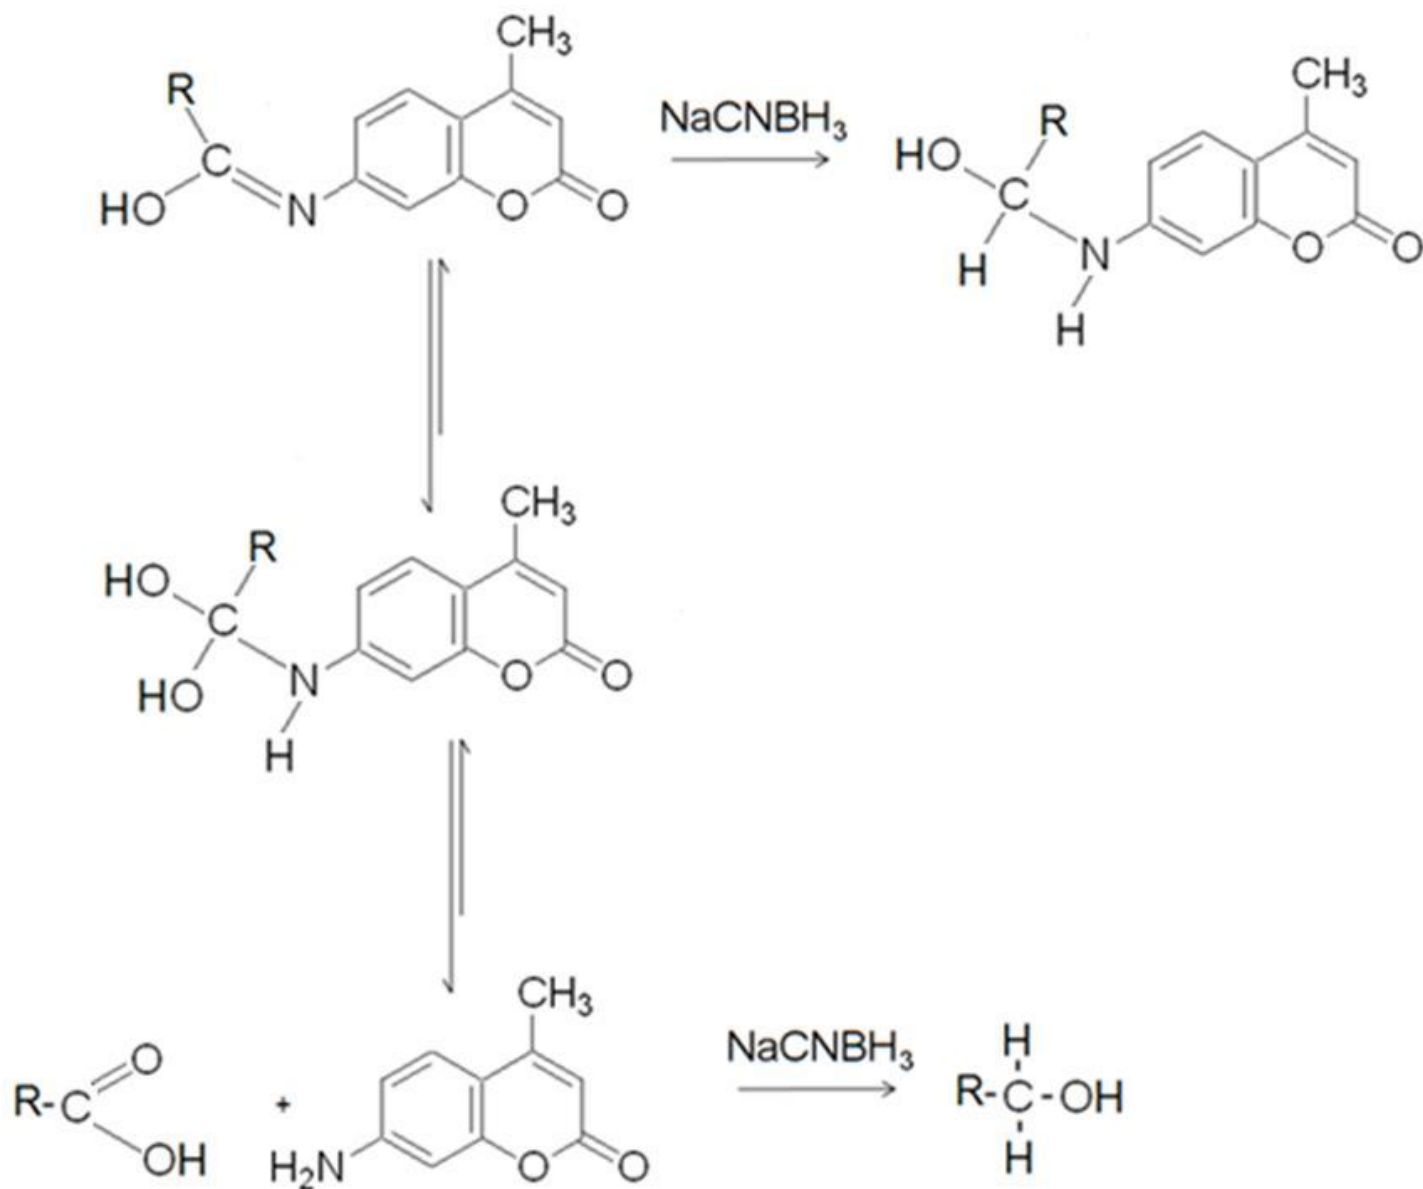

Supplement: NIHMS517527-supplement-01.pdf [file NIHMS517527-supplement-01.pdf]
